# Supplementary material
Source: publisher figshare collection journal article supplement (https://geolsoc.figshare.com/ndownloader/files/14312864)
Supplement: Supplementary file 1 [file 14312864]

## Sheet: Sheet1
Table S1 Patuki Melange ch. 7 XRF
Sample name	NZ13-324	NZ13-325	NZ13-328	NZ13-329	NZ13-336	NZ13-337	NZ13-353		NZ13-406	NZ13-408	NZ13-411	NZ13-412		N14-233	N14-234	N14-238	N14-239	N14-240	N14-241		NZ13-303	NZ13-304	NZ13-305		NZ13-116	NZ13-117	NZ13-118	NZ13-119		N14-51	N14-54	N14-55	N14-56		NZ13-81	NZ13-82	NZ13-83		N14-76	N14-81
Rock type	basalt	basalt	basalt	basalt	Basalt	basalt	basalt		basalt	basalt	basalt	basalt		basalt	aphyric andesite	pillow basalt	basalt	basalt	dolerite		dolerite	dolerite	dolerite		Diabase	feld-phyric andesite	basalt	diorite		diorite	dolerite (margin of gabbro)	dolerite	dolerite		dolerite	dolerite	diorite		Basalt	Basalt
Region	D'Urville (lower unit)	D'Urville (lower unit)	D'Urville (lower unit)	D'Urville, (lower unit)	D'Urville (upper unit)	D'Urville (upper unit)	D'Urville (upper unit)		Taipare Bay	Taipare Bay	Taipare Bay	Taipare Bay		Dun Mountain area	Dun Mountain area	Dun Mountain area	Dun Mountain area	Dun Mountain area	Dun Mountain area		Lee Valley	Lee Valley	Lee Valley		Bald Hill	Bald Hill	Bald Hill	Bald Hill		Windley River	Windley River	Windley River	Windley River		Black Ridge	Black Ridge	Black Ridge		Coal Hill incusion	Coal Hill incusion
GPS	S40 74553 E173 93583	S40 74553 E173 93583	S40 74553 E173 93583	S40 74553 E173 93583	S40 75506 E173 93807	S40 75506 E173 93807	S40 75747 E173 93250		S41 00987 E173 71999	S41 00999 E173 72023	S41 01077 E173 72051	S41 01077 E173 72051		E 25 41965 N 59 85244	E 25 41965 N 59 85244	E 25 42896 N 85527	E 25 42961 N 59 85596	E 25 43511 N 59 85980	E 25 43659 N 59 8621		S41 44844E 173 15712	S41 44844E 173 15712	S41 44844E 173 15712		S45 38040 E168 10885	S45 38040 E168 10885	S45 38040 E168 10885	S45 37906 E168 11724		E21 34492 N55 06716	E21 33738 N55 08431	E21 33753 N5508308	E21 38040 N55 06716		S45 65517 E168 22969	S45 65517 E168 22969	S45 65517 E168 22969		E21 31 533 N 55 09891	E21 31420 N 55 09648
Major Elements
SiO2	52.4509	53.3585	46.4913	46.93	41.9386	47.14	54.6171		50.5612	53.136	52.7649	53.7273		48.8545	60.8442	44.5909	48.0187	48.7749	47.1681		47.8687	47.895	48.1719		53.96	60.9838	45.6571	70.0026		61.6737	46.3815	43.7103	52.7472		42.55	49.64	61.71		45.4914	47.5312
Al2O3	15.4669	14.8291	16.7534	17.39	16.1905	16.48	15.3062		16.154	15.1905	15.2235	15.1654		12.9648	15.8902	12.7986	14.9548	15.1439	16.3707		14.3761	15.5839	12.86		14.71	15.8469	14.9041	14.2392		16.6944	13.0185	13.3827	14.6619		13.38	13.75	12.79		13.7111	16.4175
Fe2O3	9.8088	10.4139	11.3766	10.11	11.266	10.76	10.8199		11.2504	9.74775	11.9898	11.5776		12.6663	5.6516	9.15324	8.84555	10.5072	11.2561		12.3579	12.1952	13.1138		11.59	6.5549	10.2108	3.774		5.49336	14.157	11.2136	10.3455		15.47	12.25	10.02		11.3828	11.0843
MgO	2.1909	1.7255	4.0602	3.74	6.98475	3.46	4.4863		6.7568	9.44025	7.3829	6.48225		5.80085	2.21885	5.70708	6.25855	8.80575	6.05179		6.05475	6.3963	6.77005		4.88	2.2927	5.77875	1.02		1.98696	6.4152	7.1043	5.049		6.39	6.29	3.63		6.4277	5.34315
CaO	8.7435	9.32785	10.1505	10.59	17.9191	15.67	4.33405		3.8622	3.67975	2.07955	1.9095		9.02465	3.0447	21.9718	12.2186	11.5818	9.4715		11.0021	11.9068	10.8503		7.07	5.7065	18.9342	2.1216		1.4123	11.9889	18.7856	8.4348		16.25	11.26	2.68		12.4773	9.82065
Na2O	4.2813	4.02955	3.6582	3.8	-0.2613	1.41	6.2524		5.9614	2.90075	4.0596	4.95465		4.98495	6.49735	0.2988	4.2387	3.73125	4.27713		3.3534	2.8634	2.32435		3.67	5.1914	0.3015	4.9776		4.42196	2.8908	0.46765	5.3262		0.01	2.68	4.83		3.05465	2.85565
K2O	0.06633	0.037555	0.210045	0.068	0.02613	0.031	0.226345		0.12218	0.07175	0.209945	0.10653		0.245765	3.83871	0.018924	0.243775	0.47959	0.354932		0.4761	0.59534	0.378595		0.267	0.04646	0.10452	1.61262		3.01356	0.29601	0.0398	0.29898		0.089	0.217	0.208		0.645755	1.63877
TiO2	2.5517	2.59129	2.1316	1.979	0.851235	2.072	1.52453		1.50962	1.04447	1.55419	1.68337		2.20492	0.73033	0.794808	1.11241	1.25668	1.37287		1.77916	1.66963	2.03101		0.733	0.79487	0.5025	0.51		0.71589	2.1384	1.44872	0.76131		2.039	1.542	0.906		1.46962	1.26663
MnO	0.107535	0.098455	0.173865	0.147	0.201	0.145	0.12383		0.1476	0.1558	0.190045	0.133665		0.17512	0.07363	0.16434	0.144275	0.172135	0.248253		0.210105	0.206	0.21112		0.165	0.09292	0.157785	0.06834		0.074024	0.22671	0.203975	0.17622		0.313	0.192	0.117		0.192035	0.207955
P2O5	0.68943	0.705425	0.41607	0.368	0.04221	0.181	0.13398		0.15252	0.078925	0.106465	0.13668		0.19502	0.150245	0.09462	0.074625	0.09751	0.112661		0.15318	0.1442	0.17255		0.067	0.11514	0.057285	0.12342		0.15584	0.19899	0.110445	0.09801		0.163	0.106	0.13		0.144275	0.110445
LOI	3.24	2.89	4.12	4.21	4.64	2.18	2.16		3.36	4.1	4.21	3.66		2.391	0.565	4.022	3.4	-1.051	3.027		2.42	0	2.91		2.67	2.07	3.02	1.41		4.26	1.96	3.27	1.72		3.48	2.46	2.48		4.8	3.47
Total	99.5974	100.007	99.5417	99.332	99.7984	99.529	99.9847		99.8379	99.5459	99.7708	99.537		99.508	99.5048	99.6151	99.51	99.4997	99.7111		100.052	99.4558	99.7938		99.782	99.6956	99.6286	99.8594		99.9019	99.672	99.7372	99.6191		100.13	100.39	99.51		99.7966	99.7462
Trace Elements
Zn	146.4	128.7	228.8	152.6	88	29.6	157.4		103.4	95.7	111.5	101.1		105.1	90.8	64.1	76.1	147	103.5		130	109.6	112.2		82.6	56.9	85.5	83.5		99.4	141.8	105.5	73.9		148.4	100.3	118.4		114.6	133.3
Cu	33.6	29.1	37.5	34.3	22.1	6.2	25		10.5	82.5	161.2	86.3		36.6	32.1	95.5	81.5	35	7.5		31.1	43.5	54.1		43	22	96.1	52.9		26.3	67.1	66.4	32.2		31	62.3	134.4		42	67.1
Ni	83.4	93.8	214.8	131.3	76.2	39.4	47.2		29.7	32.5	20.4	10.6		40	50.9	105.3	89.9	73.1	9.3		80.7	86.9	54.9		26.6	16.2	50	20.3		23.6	74.3	44.2	20.8		19.3	43.8	28.9		64.6	60.7
Cr	263.6	237.6	543.5	284	126.4	26.1	115.7		51.2	34.8	39.7	12.7		76	60.1	326.8	340	357.6	10.3		241.6	363.9	127.4		29.1	20	91.4	19.2		48.5	138.6	132.7	20.4		5.9	96.9	13		229.7	348.2
V	266.1	270.4	411.5	362.1	319.6	418.6	470.8		309.6	331.5	407.1	360.1		132.1	130.4	247.6	276.3	338.1	361.7		418.7	372.4	407.1		329.1	160.2	314.9	316.8		129.4	444.9	355.8	391.2		479.1	368.3	436		359.2	349.9
Ba	53.9	67.9	60.8	58.7	13.7	35.8	61.2		9.6	28.3	10	14.5		634.6	234.3	19.7	13.8	15.3	10.2		36.1	38.5	32.8		25.4	16.2	5.2	246.1		211	54.2	16	111.8		18.3	73.3	27.5		54.6	79.5
Sc	32.9	32	43.5	41	51.4	36	60.3		42	40.1	42	37.3		20.8	19.9	45.2	47.5	52.3	48.6		52.7	51.8	47.5		40.8	20.1	49.2	44.8		21.5	55.4	48.5	43.2		51.7	50.4	50.5		49.6	49.9
La	31	31.6	23.1	19.5	1.2	2.4	2.4		1.1	0.8	0.9	2.8		23.5	22	n.d.	n.d.	n.d.	n.d.		0.1	1.5	3.7		0.3	5	1.2	0.9		24.8	n.d.	n.d.	n.d.		5	4.3	4.2		n.d.	n.d.
Ce	63.6	64.9	47.9	50.2	9.2	16.4	22.2		10.2	9.6	7.6	15.2		56.9	60.5	8.1	9.4	10.3	7.3		12.6	10	18.3		5.3	19.9	2.3	4.1		69.8	18.1	12.1	7.5		13.2	8.4	5.5		10.2	8.5
Nd	34.2	35.4	28.2	27.1	8.7	17.2	19.1		10.4	7.2	9.1	11.8		27.5	27	6.8	8.6	7.9	7.9		12.6	10.3	14.4		6.9	14.2	6.4	6.4		31	14.5	12.7	5.8		13.6	10.4	8.7		10.4	7.7
U	0.3	0.3	1.4	0.6	-0.1	0.3	-2.2		0	0	-0.3	0.3		2.7	2.2	n.d.	0.8	n.d.	n.d.		0.5	0.5	-0.3		0.5	0.3	0.7	0.1		-1.1	0.1	-1.2	0.2		-1.1	0.2	-1.2		0.5	0.6
Th	5.3	4.5	0.8	3.3	-0.4	-1.1	0.2		1.3	1	0.7	1.8		11.1	10.4	0.3	n.d.	n.d.	0.4		-0.5	-0.1	0.4		-0.7	1.4	0	-1.6		0.1	-0.5	0.1	-0.5		0.1	-0.5	0.1		n.d.	2.1
Pb	2.1	2.6	1	2.3	1.2	1.3	0.8		0.7	0.8	1	1.3		13.3	13.1	0.7	0.1	0.7	0.8		1	1.2	0.6		1.6	1.6	1.3	1.3		0	0.8	0.9	0.8		0	0.8	0.9		0.9	1.2
Nb	46.2	47.1	32.5	31.8	1.2	2.8	5.5		1.3	1.2	1.2	1.7		9.6	8.8	1.2	1.8	2	1.5		2.9	2.7	3.6		0.7	2.8	0.9	0.6		9.5	7.2	1.3	1		1.9	1.4	0.8		2.3	1.5
Zr	224.2	231.4	187.8	174.8	55.6	172.8	184.6		104.2	77.8	85.5	107.9		192.8	170.3	63.4	72.9	80.6	58.4		110.5	101.6	133.9		47.6	126.6	35.3	35.2		189.5	136	87.2	53.7		133.5	92.5	65.2		90	75.4
Y	35.7	34.2	38.1	35.9	21.4	47.6	61.8		35.5	28.1	30.3	36.9		31.6	29.5	24.4	26.3	30.9	24.1		42.1	37.3	49		19	31	14.3	14.1		34	50.2	35.2	21.5		48.3	35.3	27.3		35.1	30.4
Sr	256.6	286.3	159.1	146.2	18.3	2205.4	96		41.2	54.5	20.8	26.5		93.8	118.2	260.1	149.1	188.7	41.5		143.9	95.4	113.2		117.4	192.9	70.6	70.7		118	176.3	124.7	257		79.8	227.7	147.8		261.4	385.9
Rb	0.8	0.8	5.3	1.2	0.9	0.8	22.6		0.9	6.9	1.3	0.7		80.9	71.6	4.7	10	6.9	0.7		12.1	14.5	8.5		3.5	0.4	0.4	1		110.5	3.3	1	3.1		1.2	2.8	1.4		14.4	42
